# Supplementary material for: Co,N-doped carbon sheets prepared by a facile method as high-efficiency oxygen reduction catalysts
Source: Royal Society of Chemistry journal article supplement (doi:10.1039/d2ra05877d), 2022-01-01
Supplement: d2ra05877d1.pdf [file d2ra05877d1.pdf]

# Co,N-doped carbon sheets prepared by a facile method as high-efficiency oxygen reduction catalysts

Wei Zhang, Supeng Pei\* Kangwei Xu, Zhiyue Han, Jialu Ma, Yingge Zhang, Guipeng

Liu, Xiaojun Xu

*<sup>a</sup>School of Chemical and Environmental Engineering, Shanghai Institute of Technology, Shanghai 201418, China*

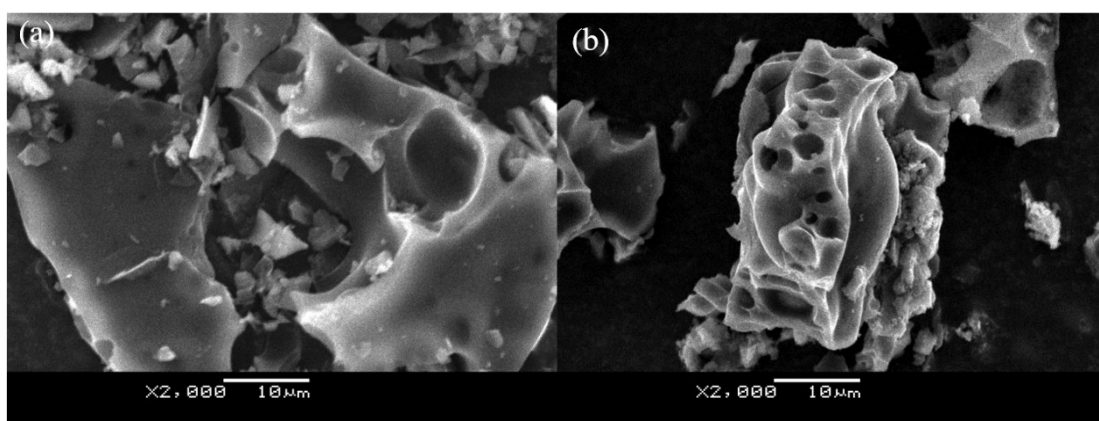

Fig. S1. Cross-sectional SEM images of N-C(a) and Co-N-C-43.8(b)

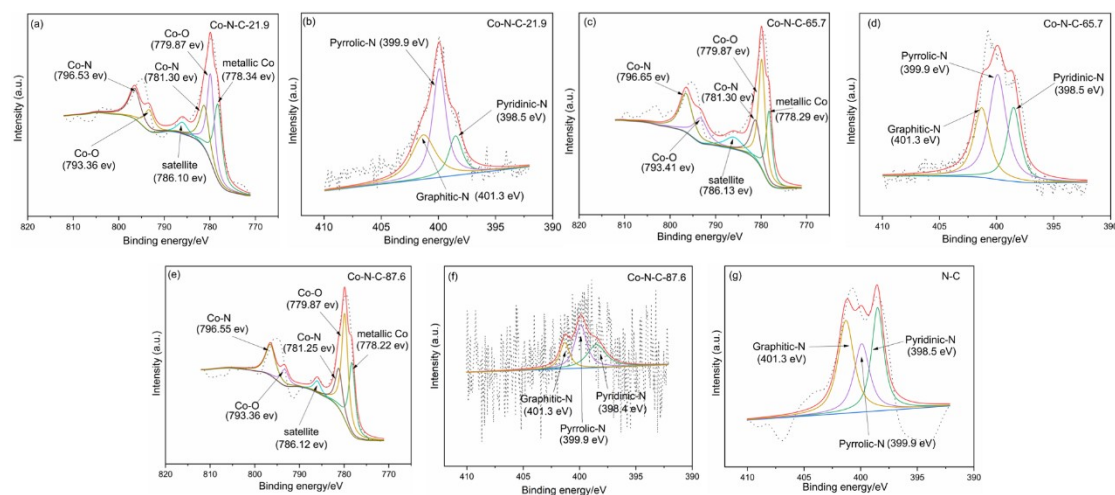

Fig. S2. XPS results of N1s and Co2p of Co-N-C-21.9(a, b), Co-N-C-65.7(c, d), Co-N-C-87.6(e, f), N-C(g)

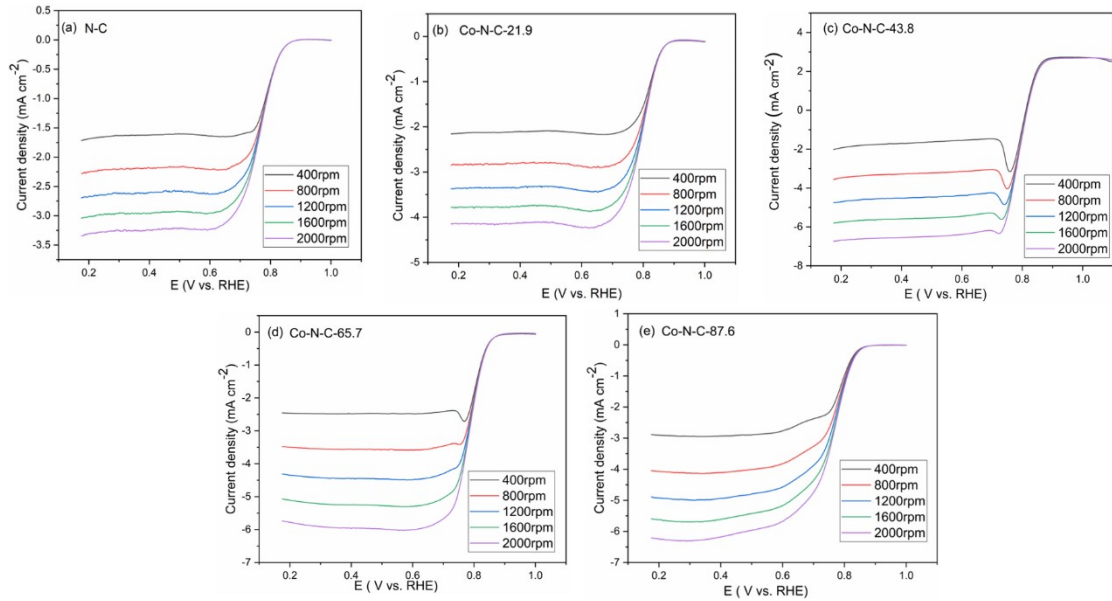

Fig. S3. LSV results of N-C(a)、Co-N-C-21.9(b)、Co-N-C-43.8(c)、Co-N-C-65.7(d)、Co-N-C-87.6(e)

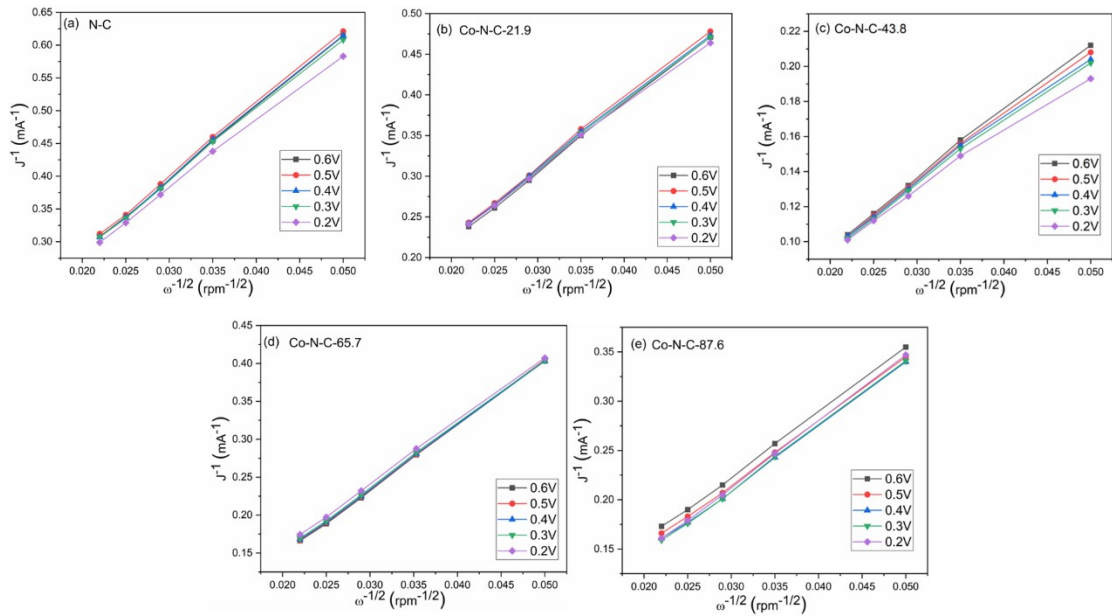

Fig. S4. K-L plots of N-C(a)、Co-N-C-21.9(b)、Co-N-C-43.8(c)、Co-N-C-65.7(d)、Co-N-C-87.6(e)

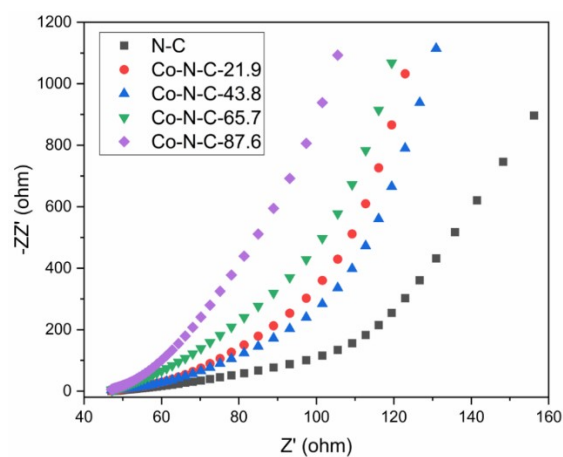

Fig. S5. Electrochemical impedance spectra of N-C, Co-N-C-21.9, Co-N-C-43.8, Co-N-C-65.7 and Co-N-C-87.6.

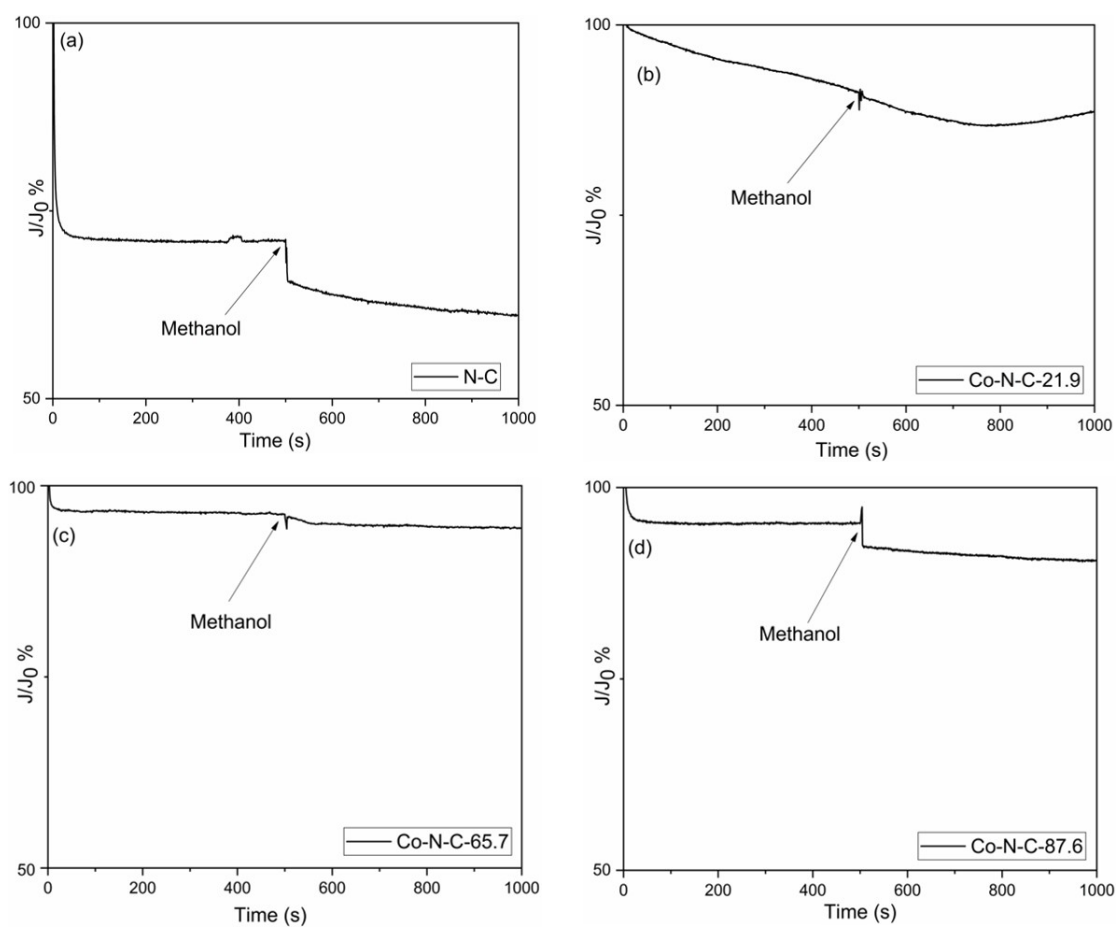

Fig. S6. Chronoamperometric responses of N-C(a)、Co-N-C-21.9(b)、Co-N-C-65.7(c)、Co-N-C-87.6(d) with 3M methanol

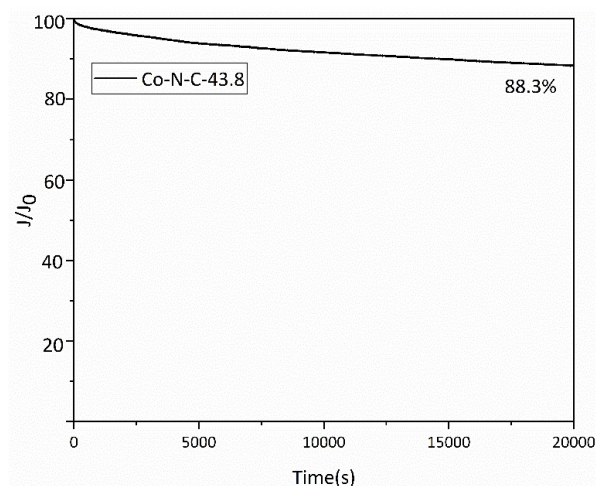

Fig. S7. Chronoamperometric responses of the Co-N-C-43.8 catalyst sample in O<sub>2</sub>-saturated 0.1 M KOH

Table S1 Element content of five catalyst samples

| Samples     | C (at%) | N (at%) | O (at%) | Co (at%) |
|-------------|---------|---------|---------|----------|
| N-C         | 94.51   | 2.38    | 3.11    | /        |
| Co-N-C-21.9 | 93.76   | 1.57    | 4.16    | 0.51     |
| Co-N-C-43.8 | 87.44   | 3.17    | 8.4     | 0.99     |
| Co-N-C-65.7 | 87.56   | 2.71    | 8.62    | 1.11     |
| Co-N-C-87.6 | 89.81   | 2.91    | 5.75    | 1.53     |

Table S2 Percentage contents of different forms of nitrogen and cobalt in five catalyst samples (%)

| Catalyst sample | Pyridine nitrogen | Pyrrole nitrogen | Graphite nitrogen | Metallic cobalt | Co-O  | Co-N  |
|-----------------|-------------------|------------------|-------------------|-----------------|-------|-------|
| N-C             | 33.19             | 27.86            | 38.95             | /               | /     | /     |
| Co-N-C-21.9     | 17.57             | 47.71            | 34.72             | 35.57           | 32.50 | 31.88 |
| Co-N-C-43.8     | 28.95             | 39.74            | 31.31             | 21.67           | 41.59 | 36.74 |
| Co-N-C-65.7     | 25.36             | 46.55            | 28.09             | 29.89           | 33.72 | 36.39 |
| Co-N-C-87.6     | 35.78             | 43.04            | 21.18             | 29.86           | 30.69 | 39.45 |

Table S3 Electrocatalytic comparison of five catalyst samples and Pt/C

| Samples | Onset potential (V vs. RHE) | Half-wave potential (V vs. RHE) | Current density (mA cm <sup>-2</sup> ) | Electron transfer n |
|---------|-----------------------------|---------------------------------|----------------------------------------|---------------------|
|---------|-----------------------------|---------------------------------|----------------------------------------|---------------------|

|             |       |       |     |     |
|-------------|-------|-------|-----|-----|
| N-C         | 0.988 | 0.767 | 3.0 | 2.6 |
| Co-N-C-21.9 | 0.925 | 0.800 | 3.8 | 3.5 |
| Co-N-C-43.8 | 0.998 | 0.800 | 5.8 | 4.3 |
| Co-N-C-65.7 | 0.965 | 0.792 | 5.1 | 3.3 |
| Co-N-C-87.6 | 0.951 | 0.763 | 5.6 | 3.7 |
| Pt/C        | 0.967 | 0.797 | 5.9 | 4.0 |

Table S4. Summary of electrochemical internal resistance values of different samples

|                 | N-C   | Co-N-C-<br>21.9 | Co-N-C-<br>43.8 | Co-N-C-<br>65.7 | Co-N-C-<br>87.6 |
|-----------------|-------|-----------------|-----------------|-----------------|-----------------|
| Resistance(ohm) | 46.57 | 44.32           | 24.50           | 42.60           | 34.93           |
